# Supplementary material
Source: MDPI journal article supplement (https://www.mdpi.com/2072-4292/11/6/701)
Supplement: s1 [file s1]

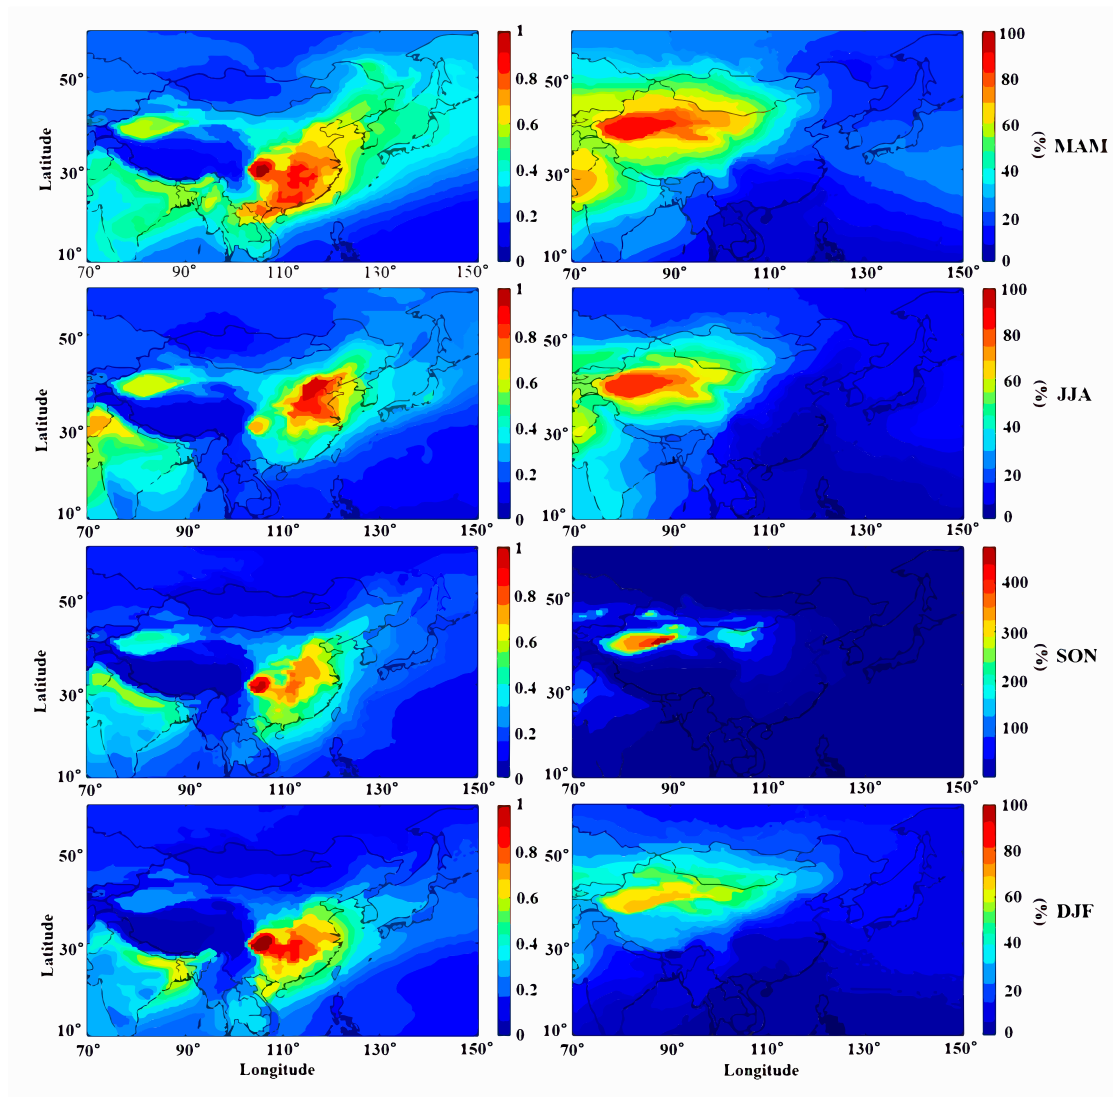

Figure S1: Seasonal distribution of Aerosol Optical Depth (left panels) and percentage contributions of pure dust to the total AOD (right panels) over East Asia based on MERRA-2 data

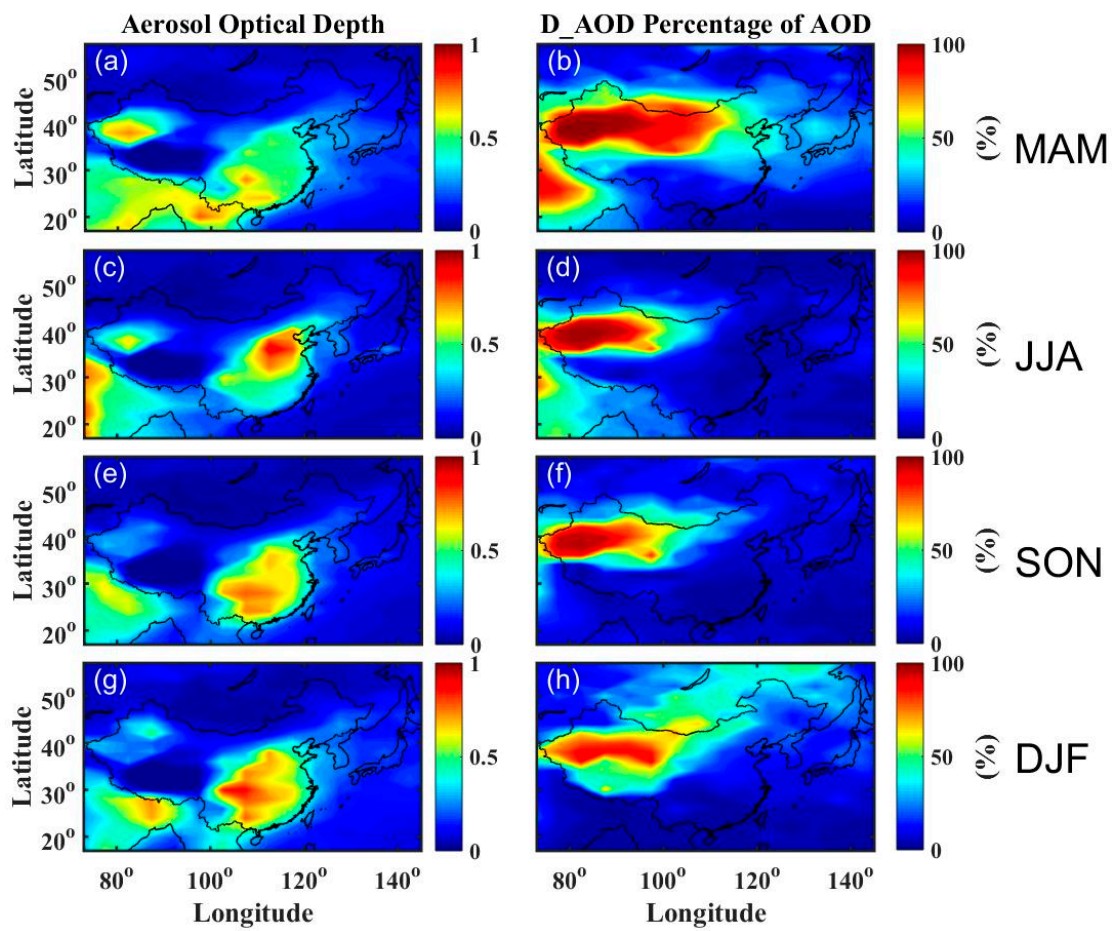

Figure S2: Seasonal distribution of Aerosol Optical Depth (left panels) and percentage contributions of pure dust to the total AOD (right panels) over East Asia based on CALIPSO data
